CORRECTION

# Correction: Fish Farms at Sea: The Ground Truth from Google Earth

The *PLOS ONE* Staff

## Notice of Republication

This article was republished on June 23, 2015, to replace copyrighted or confidential material. Please download this article again to view the correct version.

## Reference

1. Trujillo P, Piroddi C, Jacquet J (2012) Fish Farms at Sea: The Ground Truth from Google Earth. *PLoS ONE* 7(2): e30546. doi: [10.1371/journal.pone.0030546](https://doi.org/10.1371/journal.pone.0030546) PMID: [22347383](https://pubmed.ncbi.nlm.nih.gov/22347383/)

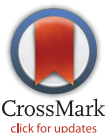

## OPEN ACCESS

**Citation:** The *PLOS ONE* Staff (2015) Correction: Fish Farms at Sea: The Ground Truth from Google Earth. *PLoS ONE* 10(7): e0134745. doi:10.1371/journal.pone.0134745

**Published:** July 29, 2015

**Copyright:** © 2015 The PLOS ONE Staff. This is an open access article distributed under the terms of the [Creative Commons Attribution License](https://creativecommons.org/licenses/by/4.0/), which permits unrestricted use, distribution, and reproduction in any medium, provided the original author and source are credited.
